# Supplementary material for: High and low dose of luzindole or 4-phenyl-2-propionamidotetralin (4-P-PDOT) reverse bovine granulosa cell response to melatonin
Source: PeerJ. 2023 Jan 16;11:e14612. doi: 10.7717/peerj.14612 (PMC9851050; doi:10.7717/peerj.14612)
Supplement: Data S1 [file peerj-11-14612-s001.xlsx]

## Sheet: BMP6
10-5M				10-9M
Group	Ct value of BMP6	Ct value of β-actin		Group	Ct value of BMP6	Ct value of β-actin
Control	26.8975	15.6526		Control	25.7534	16.9656
Control	25.3169	14.0671		Control	22.8522	13.8668
Control	27.8183	16.7044		Control	23.8657	14.9088
Melatonin	26.4494	14.8284		Melatonin	23.8883	14.0209
Melatonin	26.5951	14.967		Melatonin	23.7761	14.3742
Melatonin	26.4236	14.9762		Melatonin	23.5613	14.2364
4-P-PDOT	26.9454	15.67		4-P-PDOT	26.4217	17.7725
4-P-PDOT	27.1516	15.8592		4-P-PDOT	26.5868	17.5601
4-P-PDOT	27.1054	15.7964		4-P-PDOT	27.4057	18.5133
Luzindole	26.082	15.0128		Luzindole	24.1356	14.8309
Luzindole	26.7169	15.5984		Luzindole	22.0839	13.4223
Luzindole	26.8187	15.4436		Luzindole	23.4414	14.5487
Melatonin+4-P-PDOT	26.0243	14.4657		Melatonin+4-P-PDOT	26.7196	17.1507
Melatonin+4-P-PDOT	26.7013	15.2214		Melatonin+4-P-PDOT	28.8443	18.9937
Melatonin+4-P-PDOT	26.1775	14.8521		Melatonin+4-P-PDOT	27.1777	17.5045
Melatonin+Luzindole	26.1761	15.1926		Melatonin+Luzindole	27.3258	17.6934
Melatonin+Luzindole	25.8823	14.7854		Melatonin+Luzindole	28.6472	18.9545
Melatonin+Luzindole	25.0959	14.1592		Melatonin+Luzindole	25.6692	15.8392

## Sheet: DNMTA
10-5M				10-9M
Group	Ct value of DNMT1A	Ct value of β-actin		Group	Ct value of DNMT1A	Ct value of β-actin
Control	23.2414	14.1313		Control	24.7059	15.2565
Control	23.5163	14.2311		Control	23.5434	13.9584
Control	23.6748	14.2862		Control	24.8869	15.2407
Melatonin	23.7034	15.2319		Melatonin	23.8637	14.6831
Melatonin	25.4691	16.515		Melatonin	25.1936	16.315
Melatonin	25.2749	16.6052		Melatonin	24.3442	15.7808
4-P-PDOT	28.5245	19.2649		4-P-PDOT	24.8454	15.295
4-P-PDOT	25.45	16.6511		4-P-PDOT	23.9239	14.6044
4-P-PDOT	26.52	17.4122		4-P-PDOT	23.1247	13.9223
Luzindole	32.7461	23.3765		Luzindole	24.8618	15.4686
Luzindole	33.5805	24.1225		Luzindole	23.4958	14.1931
Luzindole	28.6247	19.438		Luzindole	25.2977	15.725
Melatonin+4-P-PDOT	23.8286	14.4047		Melatonin+4-P-PDOT	26.3624	17.251
Melatonin+4-P-PDOT	25.6127	15.1112		Melatonin+4-P-PDOT	27.5904	18.9833
Melatonin+4-P-PDOT	25.0399	14.9442		Melatonin+4-P-PDOT	26.6978	17.6303
Melatonin+Luzindole	25.2374	15.0423		Melatonin+Luzindole	26.8666	17.9832
Melatonin+Luzindole	28.1811	17.0191		Melatonin+Luzindole	28.5199	19.5972
Melatonin+Luzindole	26.244	15.6208		Melatonin+Luzindole	24.9475	15.6992

## Sheet: EGFR
10-5M				10-9M
Group	Ct value of EGFR	Ct value of β-actin		Group	Ct value of EGFR	Ct value of β-actin
Control	32.7333	15.5745		Control	26.0861	15.1792
Control	31.353	14.1162		Control	26.4735	15.8346
Control	33.6547	16.3621		Control	27.9263	17.1737
Melatonin	31.5533	15.1663		Melatonin	26.5688	16.4928
Melatonin	31.8376	15.004		Melatonin	26.172	15.8628
Melatonin	31.5939	15.2889		Melatonin	26.3202	16.4672
4-P-PDOT	32.6691	15.5507		4-P-PDOT	28.3243	17.4791
4-P-PDOT	33.1812	15.6486		4-P-PDOT	29.0827	18.2147
4-P-PDOT	32.7855	15.6846		4-P-PDOT	26.8694	16.2376
Luzindole	32.0877	15.1586		Luzindole	26.4845	16.0873
Luzindole	32.3354	15.3533		Luzindole	25.6976	14.7838
Luzindole	32.4451	15.303		Luzindole	26.7298	15.7265
Melatonin+4-P-PDOT	35.2961	14.9356		Melatonin+4-P-PDOT	25.8669	15.2718
Melatonin+4-P-PDOT	34.1384	15.3519		Melatonin+4-P-PDOT	26.3265	15.5541
Melatonin+4-P-PDOT	33.8584	15.8822		Melatonin+4-P-PDOT	27.0224	16.1904
Melatonin+Luzindole	32.02	15.0214		Melatonin+Luzindole	26.9155	16.7455
Melatonin+Luzindole	31.92	15.0069		Melatonin+Luzindole	24.0075	13.795
Melatonin+Luzindole	30.8369	13.9694		Melatonin+Luzindole	23.916	13.6574

## Sheet: FSHR
10-5M				10-9M
Group	Ct value of FSHR	Ct value of β-actin		Group	Ct value of FSHR	Ct value of β-actin
Control	30.4039	13.9133		Control	34.6446	16.0132
Control	30.9391	14.1109		Control	34.1843	15.7771
Control	30.5483	14.1665		Control	34.465	15.953
Melatonin	31.0191	14.0002		Melatonin	35.7907	16.3673
Melatonin	32.0318	15.2053		Melatonin	32.7937	14.0093
Melatonin	32.082	15.0861		Melatonin	33.0539	14.324
4-P-PDOT	34.5789	18.2234		4-P-PDOT	34.4002	16.1436
4-P-PDOT	32.9385	16.4274		4-P-PDOT	33.1095	14.6256
4-P-PDOT	34.14	17.3433		4-P-PDOT	33.3188	14.7935
Luzindole	33.77	17.4064		Luzindole	32.901	14.3578
Luzindole	33.65	17.1536		Luzindole	32.3446	13.8548
Luzindole	34.5063	18.1489		Luzindole	32.5996	14.3422
Melatonin+4-P-PDOT	31.5907	14.196		Melatonin+4-P-PDOT	35.4002	17.0614
Melatonin+4-P-PDOT	31.8538	15.0992		Melatonin+4-P-PDOT	33.1095	14.431
Melatonin+4-P-PDOT	31.5984	14.8075		Melatonin+4-P-PDOT	34.3188	15.9396
Melatonin+Luzindole	31.8487	15.013		Melatonin+Luzindole	32.901	13.9487
Melatonin+Luzindole	33.5583	16.9112		Melatonin+Luzindole	32.3446	13.6943
Melatonin+Luzindole	32.3773	15.6883		Melatonin+Luzindole	32.5996	13.9211

## Sheet: INHA
10-5M				10-9M
Group	Ct value of INHA	Ct value of β-actin		Group	Ct value of INHA	Ct value of β-actin
Control	26.3815	14.3539		Control	24.7655	15.4542
Control	26.1879	14.3735		Control	24.8563	15.5255
Control	26.2593	14.3399		Control	26.5771	17.2422
Melatonin	26.3265	13.87		Melatonin	24.6627	14.655
Melatonin	26.7785	14.1945		Melatonin	24.978	15.276
Melatonin	26.8908	14.113		Melatonin	25.3308	15.4375
4-P-PDOT	27.6433	15.7728		4-P-PDOT	26.2332	16.6493
4-P-PDOT	27.8548	15.5838		4-P-PDOT	26.2722	16.8126
4-P-PDOT	27.619	15.7369		4-P-PDOT	26.532	17.3543
Luzindole	26.7873	15.0099		Luzindole	26.5673	17.3457
Luzindole	27.3003	15.7315		Luzindole	25.6742	16.2528
Luzindole	27.7055	15.459		Luzindole	25.7246	16.1546
Melatonin+4-P-PDOT	26.3821	14.4131		Melatonin+4-P-PDOT	24.0241	14.9731
Melatonin+4-P-PDOT	27.2135	15.115		Melatonin+4-P-PDOT	23.3215	14.5058
Melatonin+4-P-PDOT	27.0429	15.0576		Melatonin+4-P-PDOT	22.0383	13.5258
Melatonin+Luzindole	26.6135	15.1017		Melatonin+Luzindole	22.3557	13.6194
Melatonin+Luzindole	27.9507	16.9536		Melatonin+Luzindole	22.7561	13.8758
Melatonin+Luzindole	26.697	15.538		Melatonin+Luzindole	22.5472	13.5415

## Sheet: INHBA
10-5M				10-9M
Group	Ct value of INHBA	Ct value of β-actin		Group	Ct value of INHBA	Ct value of β-actin
Control	24.5692	14.3656		Control	24.5027	15.4538
Control	24.7549	14.5987		Control	26.1945	17.1003
Control	24.6731	14.6614		Control	25.4845	16.5546
Melatonin	24.6685	14.6927		Melatonin	23.9699	15.937
Melatonin	25.4271	15.45		Melatonin	24.6958	16.2545
Melatonin	25.7348	15.6544		Melatonin	25.4818	16.9077
4-P-PDOT	28.0135	17.6527		4-P-PDOT	26.4217	17.7725
4-P-PDOT	26.9255	16.864		4-P-PDOT	26.5868	17.5601
4-P-PDOT	26.388	16.4459		4-P-PDOT	27.4057	18.5133
Luzindole	26.1641	16.229		Luzindole	24.1356	14.8309
Luzindole	26.5089	16.3664		Luzindole	22.0839	13.4223
Luzindole	27.1268	17.3319		Luzindole	23.4414	14.5487
Melatonin+4-P-PDOT	24.6855	14.2157		Melatonin+4-P-PDOT	27.2852	17.2708
Melatonin+4-P-PDOT	25.5233	15.3939		Melatonin+4-P-PDOT	22.9704	12.8999
Melatonin+4-P-PDOT	25.3909	15.257		Melatonin+4-P-PDOT	26.9546	17.1304
Melatonin+Luzindole	25.1986	15.2766		Melatonin+Luzindole	22.2582	14.03
Melatonin+Luzindole	27.0464	17.1626		Melatonin+Luzindole	22.2038	13.5615
Melatonin+Luzindole	25.7969	15.8063		Melatonin+Luzindole	22.3868	14.0749

## Sheet: INHBB
10-5M				10-9M
Group	Ct value of INHBB	Ct value of β-actin		Group	Ct value of INHBB	Ct value of β-actin
Control	31.6804	15.6337		Control	27.6922	15.2798
Control	30.4975	14.1907		Control	26.4812	14.245
Control	31.808	15.8366		Control	28.1537	15.776
Melatonin	31.4779	15.016		Melatonin	26.8222	13.775
Melatonin	31.554	15.0597		Melatonin	27.7801	14.7897
Melatonin	31.1108	14.4736		Melatonin	27.4142	14.4801
4-P-PDOT	31.5749	15.4728		4-P-PDOT	27.8186	15.2936
4-P-PDOT	31.3826	15.4838		4-P-PDOT	27.3341	14.9068
4-P-PDOT	31.0978	15.2369		4-P-PDOT	27.2698	14.9017
Luzindole	31.0976	15.0099		Luzindole	28.9987	16.5554
Luzindole	31.7109	15.7315		Luzindole	26.9794	14.7542
Luzindole	31.6224	15.459		Luzindole	28.5971	16.383
Melatonin+4-P-PDOT	30.4947	15.0338		Melatonin+4-P-PDOT	31.5261	17.8795
Melatonin+4-P-PDOT	31.2861	15.7728		Melatonin+4-P-PDOT	32.9451	20.0161
Melatonin+4-P-PDOT	30.0472	14.7113		Melatonin+4-P-PDOT	32.0726	18.6405
Melatonin+Luzindole	31.0399	15.3716		Melatonin+Luzindole	30.1132	18.9856
Melatonin+Luzindole	30.6494	14.7011		Melatonin+Luzindole	31.3459	19.8805
Melatonin+Luzindole	30.3912	14.3509		Melatonin+Luzindole	30.3919	18.7568

## Sheet: RUNX2
10-5M				10-9M
Group	Ct value of RUNX2	Ct value of β-actin		Group	Ct value of RUNX2	Ct value of β-actin
Control	31.7692	16.7117		Control	28.2389	16.188
Control	29.9484	14.6617		Control	25.6761	13.5859
Control	31.9765	16.8289		Control	27.2026	14.9997
Melatonin	31.1673	17.0317		Melatonin	26.218	15.004
Melatonin	31.4258	17.1195		Melatonin	27.1237	15.7617
Melatonin	31.5511	17.0001		Melatonin	26.6013	15.2954
4-P-PDOT	31.7202	16.5669		4-P-PDOT	26.9364	14.9746
4-P-PDOT	30.9066	16.0488		4-P-PDOT	26.702	14.2913
4-P-PDOT	31.7138	16.7589		4-P-PDOT	25.3885	13.7014
Luzindole	31.2318	15.8093		Luzindole	27.8581	15.634
Luzindole	31.0728	16.2392		Luzindole	26.0525	14.0533
Luzindole	31.3932	16.3778		Luzindole	28.0854	15.4791
Melatonin+4-P-PDOT	30.685	16.0372		Melatonin+4-P-PDOT	28.4958	16.7136
Melatonin+4-P-PDOT	30.6628	16.1841		Melatonin+4-P-PDOT	28.5107	17.4584
Melatonin+4-P-PDOT	30.6676	15.8103		Melatonin+4-P-PDOT	28.6202	17.296
Melatonin+Luzindole	31.1168	16.0194		Melatonin+Luzindole	29.1151	17.4985
Melatonin+Luzindole	30.5886	15.4652		Melatonin+Luzindole	29.7416	18.7099
Melatonin+Luzindole	30.0988	14.8832		Melatonin+Luzindole	27.1857	15.8164

## Sheet: CYP19A1
10-5M				10-9M
Group	Ct value of CYP19A1	Ct value of β-actin		Group	Ct value of CYP19A1	Ct value of β-actin
Control	36.5122	17.0558		Control	35.5698	15.9295
Control	36.0252	16.6204		Control	35.7955	15.8079
Control	36.459	16.954		Control	34.6358	14.7897
Melatonin	35.7732	15.5605		Melatonin	35.8544	14.9007
Melatonin	35.9298	15.2186		Melatonin	36.4527	15.7768
Melatonin	36.2385	15.4917		Melatonin	36.6644	15.4207
4-P-PDOT	35.0243	15.4988		4-P-PDOT	35.4988	15.9893
4-P-PDOT	35.1854	15.685		4-P-PDOT	35.4875	15.3764
4-P-PDOT	35.5454	16.1724		4-P-PDOT	34.3477	14.5203
Luzindole	34.6142	15.5105		Luzindole	35.6445	16.0386
Luzindole	34.9369	15.6247		Luzindole	34.2672	14.7773
Luzindole	35.5367	15.7697		Luzindole	35.5748	15.9397
Melatonin+4-P-PDOT	36.6005	15.5615		Melatonin+4-P-PDOT	34.9172	16.8579
Melatonin+4-P-PDOT	36.4165	15.9426		Melatonin+4-P-PDOT	36.8562	18.7669
Melatonin+4-P-PDOT	36.1548	15.4215		Melatonin+4-P-PDOT	35.4612	17.1682
Melatonin+Luzindole	36.7006	15.6294		Melatonin+Luzindole	34.9172	16.3217
Melatonin+Luzindole	36.0252	15.0382		Melatonin+Luzindole	36.8562	18.5386
Melatonin+Luzindole	35.2317	14.6698		Melatonin+Luzindole	35.4612	16.6654

## Sheet: CYP11A1
10-5M				10-9M
Group	Ct value of CYP11A1	Ct value of β-actin		Group	Ct value of CYP11A1	Ct value of β-actin
Control	23.7375	15.5072		Control	27.554	16.9295
Control	22.3114	14.081		Control	25.3955	14.8079
Control	23.737	15.3012		Control	26.5657	15.7897
Melatonin	23.0967	14.1396		Melatonin	25.854	14.1007
Melatonin	23.1065	14.0054		Melatonin	26.9879	15.1768
Melatonin	23.1866	14.0295		Melatonin	26.9644	15.2207
4-P-PDOT	23.687	15.6473		4-P-PDOT	26.4327	15.9893
4-P-PDOT	23.9124	15.445		4-P-PDOT	25.7464	15.3764
4-P-PDOT	23.8571	15.7097		4-P-PDOT	24.9369	14.5203
Luzindole	23.0216	15.0171		Luzindole	26.3468	16.0386
Luzindole	23.6384	15.3243		Luzindole	25.8676	15.2773
Luzindole	23.3447	15.283		Luzindole	26.7945	15.9397
Melatonin+4-P-PDOT	23.3342	14.9321		Melatonin+4-P-PDOT	26.9172	17.8579
Melatonin+4-P-PDOT	23.5229	15.1748		Melatonin+4-P-PDOT	28.8562	19.7669
Melatonin+4-P-PDOT	23.0372	14.876		Melatonin+4-P-PDOT	27.4612	18.1682
Melatonin+Luzindole	23.0619	15.1461		Melatonin+Luzindole	27.364	18.3217
Melatonin+Luzindole	22.1043	14.4298		Melatonin+Luzindole	29.135	19.5386
Melatonin+Luzindole	21.9391	14.001		Melatonin+Luzindole	26.8632	17.6654

[truncated: 7 more sheets: StAR, TGFBR3, Progesterone level, Estradiol level, Inhibin A level, Inhibin B level, Activin B level]
